# Supplementary material for: Temporal variability in detrital 10 Be concentrations in large Himalayan catchments
Source: Copernicus journal article supplement (doi:10.5194/esurf-2017-73), 2018-01-15
Supplement: Supplementary file 1 [file esurf-2017-73-supplement.pdf]

Tables S1-S3 present the range of sediment flux and CRN concentrations derived when 100, 50 and 10% of landslide derived sediment is transported to the outlet. Scenarios A and B relate to erosion scenarios described in Figure 10.

**Table S1. Assumes 100% delivery of landslide material**

|                   | <i>Background flux (Mt yr<sup>-1</sup>)</i> | <i>Landslide flux (Mt yr<sup>-1</sup>)</i> | <i>Background CRN concentration (atoms g<sup>-1</sup>)</i> | <i>Landslide CRN concentration (atoms g<sup>-1</sup>)</i> | <i>CRN-derived flux (Mt yr<sup>-1</sup>)</i> | <i>Volumetric flux (Mt yr<sup>-1</sup>)</i> |
|-------------------|---------------------------------------------|--------------------------------------------|------------------------------------------------------------|-----------------------------------------------------------|----------------------------------------------|---------------------------------------------|
| <i>Scenario A</i> | 25                                          | 1,553                                      | 51,852                                                     | 6,222                                                     | 186                                          | 1,577                                       |
| <i>Scenario B</i> | 124                                         | 311                                        | 10,370                                                     | 5,029                                                     | 197                                          | 434                                         |

**Table S2. Assumes 50% delivery of landslide material**

|                   | <i>Background flux (Mt yr<sup>-1</sup>)</i> | <i>Landslide flux (Mt yr<sup>-1</sup>)</i> | <i>Background CRN concentration (atoms g<sup>-1</sup>)</i> | <i>Landslide CRN concentration (atoms g<sup>-1</sup>)</i> | <i>CRN-derived flux (Mt yr<sup>-1</sup>)</i> | <i>Volumetric flux (Mt yr<sup>-1</sup>)</i> |
|-------------------|---------------------------------------------|--------------------------------------------|------------------------------------------------------------|-----------------------------------------------------------|----------------------------------------------|---------------------------------------------|
| <i>Scenario A</i> | 25                                          | 1,553                                      | 51,852                                                     | 6,222                                                     | 169                                          | 801                                         |
| <i>Scenario B</i> | 124                                         | 311                                        | 10,370                                                     | 5,029                                                     | 174                                          | 279                                         |

**Table S3. Assumes 10% delivery of landslide material**

|                   | <i>Background flux (Mt yr<sup>-1</sup>)</i> | <i>Landslide flux (Mt yr<sup>-1</sup>)</i> | <i>Background CRN concentration (atoms g<sup>-1</sup>)</i> | <i>Landslide CRN concentration (atoms g<sup>-1</sup>)</i> | <i>CRN-derived flux (Mt yr<sup>-1</sup>)</i> | <i>Volumetric flux (Mt yr<sup>-1</sup>)</i> |
|-------------------|---------------------------------------------|--------------------------------------------|------------------------------------------------------------|-----------------------------------------------------------|----------------------------------------------|---------------------------------------------|
| <i>Scenario A</i> | 25                                          | 1,553                                      | 51,852                                                     | 6,222                                                     | 103                                          | 180                                         |
| <i>Scenario B</i> | 124                                         | 311                                        | 10,370                                                     | 5,029                                                     | 138                                          | 155                                         |

**Table S4. Fluxes and concentrations relating to early Holocene monsoon intensification – more details in Table 4.**

|                     | <i>Background flux (Mt yr<sup>-1</sup>)</i> | <i>Landslide flux (Mt yr<sup>-1</sup>)</i> | <i>Background CRN concentration (atoms g<sup>-1</sup>)</i> | <i>Landslide CRN concentration (atoms g<sup>-1</sup>)</i> | <i>CRN-derived flux (Mt yr<sup>-1</sup>)</i> | <i>Volumetric flux (Mt yr<sup>-1</sup>)</i> |
|---------------------|---------------------------------------------|--------------------------------------------|------------------------------------------------------------|-----------------------------------------------------------|----------------------------------------------|---------------------------------------------|
| <i>Pre-Holocene</i> | 43                                          | 621                                        | 29,630                                                     | 8,515                                                     | 68                                           | 87                                          |
| <i>Holocene</i>     | 49                                          | 1,553                                      | 25,926                                                     | 8,000                                                     | 105                                          | 204                                         |
