# Supplementary material for: Temporal variability in detrital 10 Be concentrations in large Himalayan catchments
Source: Copernicus journal article supplement (doi:10.5194/esurf-2017-73), 2018-01-15
Supplement: Supplementary file [file esurf-2017-73-AC2-supplement.pdf]

## Reviewer 1 (Maarten Lupker):

In this manuscript, Dingle et al. measured the cosmogenic  $^{10}\text{Be}$  concentration of sediments exported from the Ganga catchment in the west-Himalaya. Their data-set combines modern river sediments with floodplain and terraces deposits spanning the last ca. 25kyrs to investigate the  $^{10}\text{Be}$  concentration variability in such an actively eroding system. Variability in modern  $^{10}\text{Be}$  signals had already been documented in such systems, but the present results are surprising in that the authors show that this variability has remained largely unchanged over such long-time spans and despite known changes in climate. The authors provided a sensitivity analysis of the plausible causes for the observed variability mainly in relation to landsliding and sediment evacuation. Their conclusions reach beyond the presented case study since it is implied that in actively eroding landscapes  $^{10}\text{Be}$  concentrations and erosion rates could be decoupled. Overall, I think this is an interesting and thought-provoking addition to the  $^{10}\text{Be}$  literature that tries to go beyond the simple interpretation of cosmogenic nuclides as "erosion rate meters" and seeks to take into account the actual erosion processes. I would therefore recommend this manuscript for publication in *E-surf* but I also believe that some aspects would benefit from a more in-depth discussion in the frame of a moderate revision.

General remarks: - I am convinced by the demonstration that landsliding and landslide characteristics (location, depth etc.) can drive a significant variability in the  $^{10}\text{Be}$  signal if this material is mobilised rapidly within the fluvial network. Where I am a bit puzzled however, is how the models and sensitivity calculations in this manuscript compare with, for instance, the work from Niemi et al. (2005) or Yanites et al., (2009). These two papers have a thorough treatment of the landslide impact on  $^{10}\text{Be}$  signals (landslides are spatially and temporally resolved and include a proper landslide frequency-size distribution) but suggest that for higher order catchments the bias towards underestimated CRN-derived erosion rates compared to volumetric rates is limited. In this work it seems that this bias is at least a factor 2 (Figure 8d), if not much more and these biases are also emphasized in section 5.3. Is this a result of how the different models are set-up or is this linked for instance to the hypsometry of the catchment (and large range of surface production rates)? I think, that the authors should be more upfront in comparing their approach with these published studies and better discuss where the apparent different conclusion may come from.

Firstly, thank you for your comments on our manuscript. In response to your first general remark, we believe that the main differences lie in the fact that the analysis we have carried out examines the effect of the largest events in a catchment, rather than simulate how catchment-averaged concentrations vary in a landscape that has been allowed to evolve towards steady state conditions. Furthermore, we are not trying to compare or fit our analysis to actual data such as we see in the Niemi *et al.* (2005) paper. Instead, we want to test how outlet concentrations vary in response to a large single event with variable characteristics. This allows us to explore if there are there certain conditions under which deeper landslides with lower CRN concentration sediment might have a greater impact. We also did not add a power-law distribution of landslide area/depths or have a landscape evolution style model, which would allow stochastic landslides to continually occur over the landscape until nuclide concentrations attain some kind of 'steady-state'. Instead we apply a background erosion rate (0.2-2 mm/yr) across the landscape (which we assume to represent this steady state condition) and we add in an extreme event (which generates numerous landslides) to see what impact this has. We use an average landslide depth for this extreme event.

One could argue that this may be unrepresentative, given the power law distribution of landslide size/depth vs frequency. But, at any one time it is unlikely that a single concentration sample would integrate sediment from this full distribution of events. Instead, it seems more realistic that a catchment-averaged sample is likely to integrate a proportion of that distribution. As such, we vary our average landslide depth to represent the variation in the position of that window along the power law distribution. We assume that the smaller and more frequent events (we could consider these the inter-seismic, monsoon storm initiated landslides) are captured in the background erosion rate. The event we model is the equivalent of adding in events from the high magnitude tail end of a power law distribution that might record a seismic trigger.

Without jumping ahead too much to our responses to other comments, we have perhaps under-represented a couple of important points; namely, the assumption that the landslide material is generated from a landscape under steady-state conditions (i.e. with a fully developed concentration profile), and that following a landslide, there is instantaneous delivery of this sediment to the fluvial network. By incorporating these two factors into our modelling, we can produce additional results that are much more comparable to the Niemi *et al.* (2005) and Yanites *et al.* (2009) papers which we feel strengthens this manuscript.

Abstract: “We demonstrate that in certain systems.....it is possible to generate larger sediment fluxes....”

- Maybe somewhat related, I also think that the steady state assumption and what it implies for the conclusions of this study should be addressed in more details. The 0.5% of landslide surface, suggests that the landslide recurrence time at a given point of the landscape is roughly 200 years (assuming that the landslides are randomly distributed over the entire catchments). The  $^{10}\text{Be}$  concentration profiles are therefore likely quite far from steady state (depending on background denudation rates and production rate) and the overall  $^{10}\text{Be}$  concentration of eroded material much lower than expected. This may therefore well be quite a strong assumption.

Yes, we agree that this is a strong assumption. This is why we have examined how varying the initial surface concentration of landsliding changes the outlet concentration (see Figure 8 part c). On page 10 we state the assumptions we have made about this as well. We also feel that this better represents the fact that landslides are more likely to occur in parts of the landscape with faster background erosion rates (e.g. Binnie *et al.*, 2007), and therefore, lower surface concentrations.

However, we agree in that we have perhaps over-looked this, and have run additional analyses to examine how this might influence our results. An additional set of runs have been made using lower landslide surface CRN production rates of 10 atoms/g/yr (rather than 35), such that sediment generated by the landslides has a lower (depth-averaged) CRN concentration than initial model runs. The results of this can be seen below.

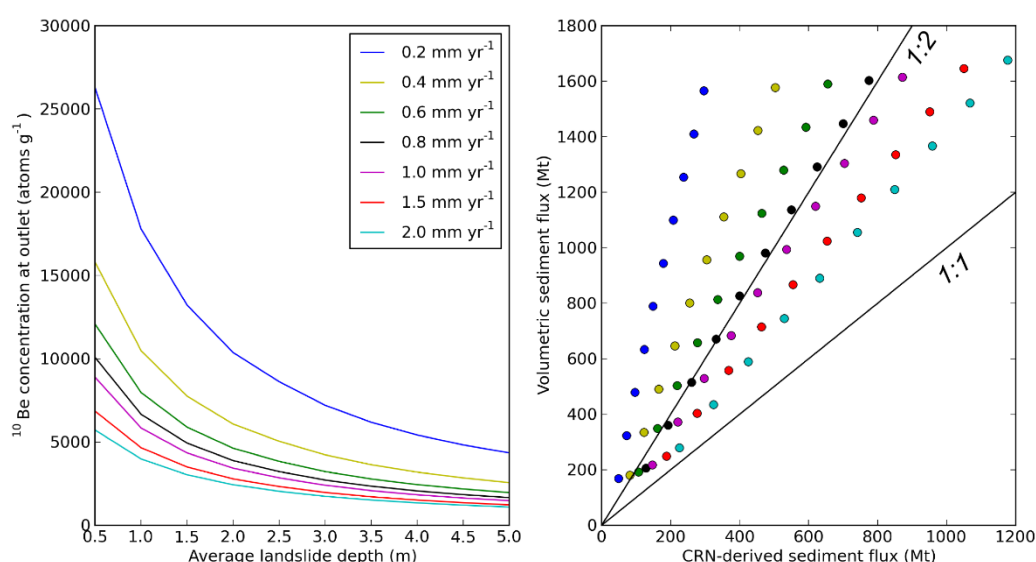

The absolute CRN concentrations we get here are much lower than the initial runs (maximum concentration in Fig 8 is  $\sim 72,000$  atoms/g where average landslide depths are 0.5m), which also helps bring the volumetric and CRN-derived sediment fluxes to more comparable levels in the figure on the right (more so where background erosion rates are higher). This also suggests that the effect of rare but large magnitude events in systems which are more stable with lower background erosion rates will have a greater effect on catchment-averaged CRN concentrations.

- As I mentioned earlier, I find the discussion on how landslides in different subcatchments can drive a high variability in the  $^{10}\text{Be}$  signals convincing but in comparison the role of sediment storage and transfer in limiting this variability quite short. It seems however that this is crucial in interpreting the data since without these dampening effects the expected variability would be much higher. Is there a way to provide a more quantitative approach to this part of the system? Since you can model the expected variability that is induced by landslides, could you for instance estimate the size of the buffer needed to filter this variability to within roughly a factor 2? The fact that this variability is preserved over such a long time-scale would suggest that this buffer capacity is a characteristic of this catchment.

Yes, we think this is also something that is worthwhile examining. We have included an additional plot showing what happens to the catchment outlet concentration when different proportions of the landslide flux are delivered. We have explored what happens if 20,10,5 and 3% of the landslide generated sediment is mixed into the catchment average, respectively. We examine only the first year, as would expect the input of landslide material to decrease in subsequent years.

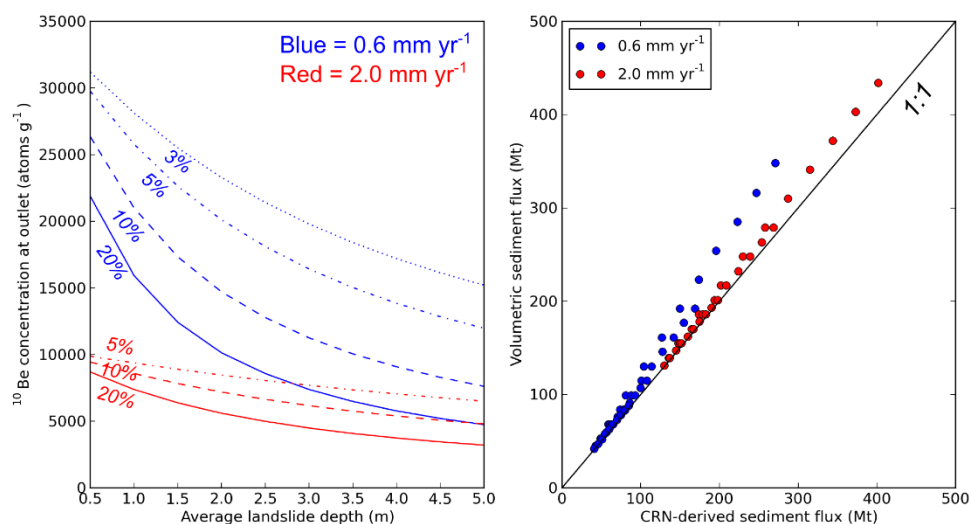

In the figure on the left, we have reduced the landslide event surface production rate to 10 atoms/g/yr to mimic regions with faster background erosion rate, and then used two catchment-wide background erosion rates (for ‘non-event’ parts of the catchment) ( $0.6$  and  $2.0 \text{ mm/yr}$ ). What we see is that under faster background erosion rates, the magnitude of landsliding event can be ‘lost’ in expected variability (i.e. all values are within 100% of the highest concentration) if only 5% of the landslide material makes it into the fluvial network. Under lower background erosion rates, to reduce all concentrations within  $\sim 100\%$  of the largest concentration, a maximum of  $\sim 3\%$  of the landslide material needs to be entrained). If greater quantities of landslide material get into the network, the catchment-averaged concentrations become much lower (i.e. beyond what you might expect within natural variability) with deeper landsliding events. By incorporating this into our calculations, we see that the relationship between volumetric and CRN-derived sediment fluxes is much more comparable (figure on the right).

This raises some interesting points. The valley fill estimate for the Ganga basin in Blothe and Korup (2012) was pretty low in comparison to other Himalayan systems, and we see a fairly limited sand content in modern gravel bars ( $\sim 10\%$ ). It is possible that a lot of this sediment is being stored within the landslide deposits themselves, and is only being mobilised and transported through the system by very high (and probably very localised) discharge events (e.g. a monsoonal storm or GLOF). It looks as if the sediment generated by these types of events is capable of driving significant change, but its impact is limited by the ability of the fluvial system to mobilise it. One explanation is that during strong monsoon seasons or discharge events, a greater proportion of low CRN concentration sediment

is mobilised from deposits/hillslopes as water stage rises and this could drive the variability we see at the mountain front.

- One of the important messages of the manuscript is that CRN-derived sediment fluxes likely underestimate actual volumetric sediment fluxes (and maybe by a significant amount). Our data of Lupker et al., (2012) suggests that  $^{10}\text{Be}$  fluxes appear similar to slightly larger than gauged fluxes for large catchments in central Nepal. This work therefore suggests that the actual long-term fluxes implied by the CRN data might actually be much larger than currently measured (gauged) fluxes if this bias is taken into account. I would be curious to have the authors opinion on whether this could be a sign of a recent decrease in sediment fluxes or just induced by a large uncertainty on both methods?

Our additional analysis suggests that this pattern may not be as apparent as we first proposed. Our main concern with the gauged fluxes is that they are unlikely to fully capture/truly represent what is being transported during the big monsoonal storms, and they certainly don't record what is being moved as bedload. These 2-3 day events seem to be really key in moving sediment out of these systems and into the Plain. These suspended sediment records are also pretty intermittent and patchy in space too, and can be destroyed during large flows, so it's difficult to quantify the uncertainty. Similarly, the CRN records might not be incorporating shorter-term trends or changes.

Minor comments: - This might be wrong on my side but I would not speak of error when referring to the natural variability in the  $^{10}\text{Be}$  concentrations of the river sediments (e.g. abstract l.13) or when referring to uncertainty in measured data (e.g. l.5, p.3).

Yes agreed. This has been changed to 'variability' and 'uncertainty', respectively.

- The SLHL  $^{10}\text{Be}$  production rates that were used in CAIRN for the calculation should be mentioned somewhere. On the same topic, it be better to stay consistent throughout the manuscript with the use of CAIRN and not change for the CRONUS calculator for a series of sub-catchment (l.8, p.9). I know CAIRN does not explicitly need to the catchment averaged production rate estimates but it must also compute these values across the catchments. This may also explain why the entire Ganga catchment in table 2 has a production rate of 33 at/g/yr but the rest is modelled with a production rate of 35 at/g/yr in table 3 & 4.

CAIRN doesn't explicitly produce an average production rate, you would need to average all of the values in the production rasters for each sample. The 35 at/g/yr in table 2 is just an average value we have used in the calculations.

- p.6, l.26 and Figure 4: I would keep the original sample name instead of LUPK09 to make it easier to trace across publications: BR924.

Yes, changed.

- What is the rationale for choosing the sub-catchments of Figure 7 and l.5, p.9?

This was to generate a range of different catchments with the maximum range of possible production rates, yet maintain comparable drainage areas between some of the examples. The main purpose was to essentially demonstrate that events could happen in different sub-catchments with very different CRN production rates.

- The chosen 0.5% of landslide area applies to co-seismic landsliding but is probably high for inter-seismic landsliding. Why has a such a high co-seismic landsliding value been chosen?

This is simply based on the landslide areas generated by the Chi-Chi and Gorkha earthquakes (~87-128 km<sup>2</sup>), and expressed as a fraction of the total Ganga catchment (which equates to ~115 km<sup>2</sup>). This is just to reflect the area of landsliding which can realistically be generated by an extreme event,

although we are aware that this may be slightly on the high side, as would be unlikely that all of the landsliding would occur within a single catchment.

- L.13, p.9: see also Gorkha landslide statistics in Roback et al., 2017 (Geomorphology).

Reference added

- L.2, p.8: there is a typo: draw a clearer picture –

Thanks – changed!

L.1-2, p. 12: Godard et al., 2012 (JGR-ES) have contradictory results suggesting high glacial erosion in the Marsyangdi.

Yes. This is an important reference we hadn't seen.

L32 p3. We have added in a reference to Godard *et al.* (2012) concerning geomorphic process domains

L9-13 p13 . Changed the reference to Heimsath and McGlynn to look at 'localised' erosion and added the following text:

'An analysis of the evolution of detrital  $^{10}\text{Be}$  concentrations along the Marsyangdi River suggested that low concentration  $^{10}\text{Be}$  inputs from glaciated tributaries dilute main stem  $^{10}\text{Be}$  concentrations (Godard *et al.*, 2012). In this instance, glacial erosion was averaged at  $\sim 5$  mm/yr in the High and Tethyan Himalayan portions of the Marsyangdi catchment, suggesting that glacially derived sediments may complicate detrital CRN concentrations and interpretation of catchment-averaged denudation rates.'

- L.14, p.13: I did not understand where the 7 and 10% came from.

We did not explain this clearly. This is to mimic the effect of buffering of event concentrations, which we know must happen across these systems. We have also removed this section from the manuscript now as buffering is covered in more detail in the modelling work which is sufficient to help explain the Holocene climate change.

All suggestions are meant in a constructive way and are open for discussion. I hope they will contribute to further improve the manuscript. Maarten Lupker - ETH Zürich (17.02.2018)

## **Reviewer 2**

Dingle et al. present eighteen  $^{10}\text{Be}$  concentrations and denudation rates from modern river sediments, flood plain and terrace deposits along the middle part of the Ganga river. The observed variability in nuclide concentrations and denudation rates is discussed mainly in the light of stochastic sediment input into the river system. The presented model simulations demonstrate that cosmogenic nuclide concentration cannot always be used to determine sediment flux.

General comments: The manuscript is developed around the cosmogenic nuclide concentrations which show a not easy to explain scatter. One problem in comparing these nuclide concentrations is that the nuclide concentrations are derived from spatially and temporally different sediment samples.

Yes we agree that this is a challenge with these types of data and this is why we wanted to explore this subject. In many cases, this is the only type of data we have available as there are very few long-term sampling campaigns.

The spatial variation should be investigated independently from temporal variation with a larger data set of modern samples from different locations. The temporal variations should then be investigated with a comparison to a modern sample from a comparable location.

This is a worthy aspiration, and makes good sense. However, building a temporal record is limited by having well preserved, dateable and sufficiently thick terrace deposits to ensure that the sample has been sufficiently shielded since deposition. In fact, some of our initial sampling was aimed at this, but variable quartz concentrations made analyses difficult. The data we have presented do offer a valuable insight based on terraces preserved close to the mountain front along the Ganga River. We agree that this could be the basis of a future and longer term monitoring campaign. The majority of samples are also below the final major tributary confluence in the Ganga catchment (Alaknanda-Baghirati) so the spatial area these samples represent should be fairly comparable when considered against the total size of the Ganga catchment.

In addition to this, the situation is further complicated as samples with different deposition ages may be affected by different denudation processes (e.g., glacial- dominated versus landslide-dominated). Therefore, a comparison of all data from modern to deposited river samples is difficult and should be disentangled.

We agree that different denudation processes complicate this signal, which is what we try to explore in the paper. What we are essentially trying to ask is ‘what does an average CRN concentration actually represent in terms of sediment generation and transport?’ By plotting against age, we hope that it is possible to appreciate the likely changing influence of glacial debris.

Another problem could arise from the comparison of nuclide concentrations rather than denudation rates. Assuming sediment from two catchments with the same denudation rate but different production rates (e.g., two tributaries sampled above their confluence) will have different nuclide concentrations. Even so the catchments are subjected to the same erosion processes the nuclide concentrations are different. Therefore, it would make sense to compare denudation rates rather than nuclide concentrations.

See above comment. The point is we measure CRN concentrations from samples, not denudation rates. We calculate denudation rates based on a series of assumptions applied to these concentrations. This is why we are sticking with concentrations, although have also considered denudation rates calculated using the CAIRN method (Mudd *et al.*, 2016) in Figure 6.

Furthermore, a way to go could be that the manuscript is developed around a discussion of the presented model in comparison to Niemi *et al.*, 2005 and Yanites *et al.*, 2009. This discussion could explain nicely why findings in this study are different from others. Furthermore, there should be an attempt to integrate the presented cosmogenic data into the model findings.

Agreed. Please see response to Reviewer 1.

Would it be possible to select the investigated catchments for model calculations where there are also cosmogenic nuclide data available supporting the model findings?

Good idea, but no, our data are limited to a small spatial area close to the mountain front and therefore integrate the majority of the Ganga catchment. Data further upstream are limited.

Suggestions for changes:

Title: Not convinced if this is the right title for this study. The study’s strength seems to be more the model simulation than the cosmogenic concentrations. If this title stays then it should be: “Temporal variability of detrital  $^{10}\text{Be}$  concentrations in a large Himalayan catchment: the Alaknanda/Ganges river”?

We feel the strength of this paper is the new dataset we have presented, and the modelling work is more of an investigation/sensitivity analysis to explore possible explanations. Will modify to “Temporal variability in detrital  $^{10}\text{Be}$  concentrations in a large Himalayan catchment”

Abstract:

P1, L5: “. . .  $^{10}\text{Be}$  concentrations at the catchment outlet are relatively stable in time”. The  $^{10}\text{Be}$  concentrations are generally invariant over time.

Ok, changed.

In addition, the use of catchment outlet here and in the entire manuscript is somehow misleading. The reader most likely attributes to catchment outlet the delta. This should be clarified.

We have clarified what we term as outlet at the end of the introduction and removed references specifically to the Ganga outlet prior to this.

“Motivated by the results, we examine the impact of stochastic inputs of sediment from the upstream mountain catchment on  $^{10}\text{Be}$  concentrations close to the mountain front (herein termed the Ganga outlet).”

P1, L11-13: Is the doubling of sediment delivery to the Bay of Bengal just during 11 to 7 ka or does the doubling start at  $\sim 9$  ka and lasts until present-day? Again, the use of Ganga outlet is misleading.

See above. We have also clarified this sentence to read ‘doubling of sediment delivery to the Bay of Bengal between 11-7 ka’.

1 Introduction

P2, L6-10: Simplification of this long sentence would be helpful for the understanding. Furthermore, please make sure of the consistent use of erosion or denudation rates.

This sentence has been split into two.

“Based on this approach, catchment-averaged denudation rates can be calculated, and converted into CRN-derived sediment fluxes which are typically averaged over hundred to thousand year timescales. These timescales are a function of the landscape denudation rate (i.e. the time taken to erode to a depth equivalent to the cosmic ray attenuation length in that landscape).”

Erosion changed to denudation

P2, L12: Would be helpful to clarify what the size of a small catchment is?

$<100 \text{ km}^2$  (i.e. Yanites *et al.*, 2009). This has been added to the sentence.

P2, L25: Wondering why we jump to the Ganga-Brahmaputra delta. This delta is important, but not for the main findings of this manuscript. This paragraph needs to be packaged differently.

The Ganga-Brahmaputra is the only long-term record we have of sediment flux out of the Himalayan mountains at  $10^4$ - $10^5$  yr timescales. This is vital in comparing sediment flux estimates (and therefore erosion rate estimates) where we know that the majority of sediment generated within the mountains bypasses the foreland basin and is delivered here. Understanding that there has been a big change in sediment delivery to the delta during the early Holocene underpins much of this paper, as we would expect to see this preserved in the ‘erosion’ record. Our results suggest that the variability in CRN concentrations is sufficiently high to mask these kinds of large-scale climatic shifts which we see preserved in the off-shore record.

P2, 28-29: Would this make sense?: “. . .major Himalayan river systems has halved due to the reduction in monsoon rainfall since the early Holocene time.”

Changed to “Sediment volumes in the Ganga-Brahmaputra delta imply that overall sediment flux from these two major Himalayan river systems has halved due to the reduction in monsoon rainfall since the early Holocene”

P3, L12L: Would it make sense to start this paragraph with a short introduction to the Alaknanda and Ganga rivers?

We thought it would be less confusing to keep all of this information for the following section (which is the next paragraph as well).

P3, L14: What is meant by “ancient”?

Samples which are not taken from the modern river channel (i.e. are preserved in terraces or flood deposits which we have independent OSL dates for).

Text changed to “. . .in both ancient (i.e. independently dated terrace and floodplain deposits) and modern fluvial sediments. . .”

P3, L16: “ making it the ideal techniques. . .”. What is meant by it? Please be more concise.

Other isotopes with shorter half-lives may begin to decay over the timescales we are interested in, which is another factor we would then have to correct for.

## 2 Study area and context

Would It make sense to split this chapter up in 2.1 Study area and climate and 2.2 Sample information?

We have added in ‘sample information’ as a sub-heading.

P3, L26: Would it make sense to state here that the upper Ganga catchment or the mountainous part of the catchment is investigated in this manuscript?

We have added this text to clarify: “This study focuses on the portion of the Ganga catchment upstream of the Himalayan mountain front, the most downstream extent of which we also term the catchment outlet.”

P4, L2: The use of the abbreviation ISM is not explained. This should happen here. Please also cross-check the consistent use of other abbreviations.

Done. P3 L21 is first use of the term so it is explained here.

## 3 Methods

A reorganization of this chapter could clarify the understanding of the method used. A possible way to go could be: 3.1 Sample collection (P5, L15-31) 3.2 Sample preparation (P5, 32 to P6, L14) 3.3 Calculation of denudation rates (P6, L15-24) Alternatively, if the authors decide to structure the manuscript around the model simulation, the used model should also be described here.

We have added in sub-section headings of Sample collection, Sample preparation and Denudation rate calculations.

This chapter needs to be treated with care for correct wording, for instance: P6. L13: Different value of half-life than used above.



Corrected the first instance to  $1.36 \times 10^6$  years

P6, L15-24: How was the glaciation taken into account? How are the shielding factors calculated?

Glacial cover was determined from the GLIMS database and fed into the CAIRN modelling as a raster. Shielding factors are calculated in the CAIRN model/methodology (Mudd *et al.*, 2016) – this is not something to be explained in this manuscript as details are available in published material which is referenced throughout this paragraph.

#### 4 Results

Results such as nuclide concentrations and denudation rates should clearly be separated from discussion (e.g. 2nd paragraph in the results should go into discussion). In addition, some results of the discussion addressing the model simulations could come in here if 3 Methods includes the model set up.

Much of the second paragraph from Results has now been moved into the discussion in a new subsection called ‘CRN sample interpretation’.

P6, L26: What is with the third modern river sample? It should be mentioned here too.

The sample we have referred to as LUPK09 (which has now been renamed BR924) refers to a sample presented in Lupker *et al.* (2012) taken at the same location as our sample RAEM. We have one additional sample further upstream (BGM) which is further upstream of the Alaknanda-Bhagirathi confluence. As such it has been separated from the other samples in this section as does not integrate the Bhagirathi drainage area. A sentence has been added to this effect in the first paragraph of the results section.

P7, L9: Is the sample BG1.8 not attributed a depth of 500 cm (see Table 1)?

The sample was taken from 500cm below the modern surface, but the individual event bed was measured at ~50cm thick.

#### 5 Impact of stochastic inputs on CRN variability and sediment flux estimates

As mentioned above, it could make sense to describe the model simulation in 3 Methods. This would simplify the discussion. The discussion could be arranged in (as a suggestion): 5.1 Discussion of nuclide concentrations and denudation rates 5.2 Findings of model simulations (e.g., all simulations) 5.3 Sources of variability of CRN concentrations 5.4 Suitability of CRN as a proxy for sediment flux in large catchments

We had actually considered this in an earlier draft of the manuscript but felt it was clearer to separate the numerical analysis from the CRN sampling. This was because the variability we observe in our samples prompted the numerical analysis. The degree of variability in the CRN samples and their insensitivity to Holocene climate was a finding in itself, so it was difficult to explain the numerical analysis without first presenting the CRN sample results (if that makes sense!).

#### Figures:

Fig. 1: It would be helpful to indicate in the figure what figure the red box refers to. Could the river names be added to this figure?

Yes, added.

Fig. 3: Denudation rates to the sample ID would be helpful here. It is difficult to combine Table 1 with this map. Where is the LUP09 sample situated?

Position of LUP09 (now BR924) has been added. Denudation rates are shown in Figure 6 as well – have tried adding them onto this figure but over-clutters it.

Fig. 4: Would it make sense to include also a figure with denudation rate versus age?

Given that most of the samples fall within the variability of the modern samples (Fig. 6) it seems doubtful it would present anything extra to the argument.

Fig. 9: Is the % grain size of the entire sample volume or from the sand/silt/clay volume? What are the references to source material? Y-axis label should be “% sand (grain size < 1mm)”.

The graph shows the fraction of the entire volumetric sample which is finer than 1 mm. Reference has been added to figure caption, and axis label updated to % sand (grain size < 1mm).

Fig. 10: Not totally clear what “CRN concentration (% of surface)” means. Could you clarify?

Yes it’s simply the concentration at that depth represented as a fraction of the concentration at the surface (which will be the maximum value – i.e. 100%).

#### Tables:

Table 1: There is important information missing for the cosmogenic nuclide method. It could make sense to make two tables out of this table: Table 1 including the geomorphic and other information (e.g., column 1 to 9 plus grain size distribution by Dingle et al., 2016) and Table 2 column 10 to 15 plus additional information (e.g., analyzed grain size, production rates, apparent age). It is not clear what the average shielding factor includes. Why do the first eight samples have the same value in the shielding factor?

We stated the grain size analysed in the methods section (250-500  $\mu\text{m}$ ). The average shielding factor is an average of the topographic and snow shielding factors generated in CAIRN, which is stated as a footnote on the table. The repeated shielding factors have subsequently been corrected, and revised erosion rates added to Table 1 and Figure 4 and 5 (although these changes are very small).

Table 4: Not sure if I missed something but is scenario 1 and 2 the same as model A and B in figure 10? Please clarify.

No these are not the same values. Scenario 1 and 2 are designed to simply highlight that a doubling of volumetric sediment flux can be generated within background CRN variability, perhaps explaining why no obvious change in CRN concentrations are documented at the Ganga mountain front through the Holocene. We have subsequently removed the scenario 1 and 2 section as feel that the additional analysis looking at buffering explains the Holocene climate story.
